# Supplementary material
Source: PubMed Central journal article supplement (PMC3113674)
Supplement: supp_jcs.083311_JCS083311TableS1.pdf [file supp_jcs.083311_JCS083311TableS1.pdf]

**Table S1. Primers used for qRT-PCR**

| <b>Gene name</b> | <b>Forward Primer (5' to 3')</b> | <b>Reverse Primer (5' to 3')</b> |
|------------------|----------------------------------|----------------------------------|
| <i>Adamts5</i>   | gaagagggccatataaccgttct          | caggacacctgcatatttgggaac         |
| <i>Agrn</i>      | tgcgctccactgtgaaggtaa            | ccatctgtgtccaattgtgtggca         |
| <i>Col6a1</i>    | attacggatggacgttctgacactca       | gataagccttggcaggaaatgacattga     |
| <i>Lgals1</i>    | gccagcaacctgaatctcaaact          | ctgtctttcccagggtcagcaca          |
| <i>Lgals3</i>    | gcacagtgaaaccaacgcaa             | tgctctgctcgtgttacacaca           |
| <i>Mmp2</i>      | cctaagctcatcgcagactcctg          | cttccaaacttcacgctcttgagact       |
| <i>Itga3</i>     | cctccagacacctccaacattacca        | gtagggatgctggttctcaggaa          |
| <i>Itga6</i>     | gcttccatagatgtcaccgctgct         | gcaagaacagccaggaggatgat          |
| <i>Itga7</i>     | gatcgtccgagccaacatcaca           | ctaacagcccagccagcact             |
| <i>Lama4</i>     | ggaatacctgaacgtgcacatgaga        | gtgccatctgccatcacagagattct       |
| <i>Lama5</i>     | ctacatgcagctgaagggtgctga         | ggtgccaccgtccatcacaaa            |
| <i>Nid1</i>      | caccaaccggaggattctcgca           | agcccttcgagaactttgctct           |
| <i>Tnc</i>       | acctgagcaaaaatcacagcccaa         | gatctaccattgtgatagttcatggagtca   |
| <i>Timp1</i>     | actctgagccctgctcagcaa            | cgccacaaacagtgagtgtcact          |
| <i>Timp2</i>     | gtgagcgagaaggaggtggattc          | tcgatgtctttgcaggctccttga         |
| <i>Gapdh</i>     | caatgtgtccgctcgtggatctga         | gagttgctgttgaagtcgcagga          |
